# Supplementary material
Source: Springer Nature journal article supplement (http://www.springermedizin.de/resource/supplementary/12955_2005_228_MOESM2_ESM.pdf/9559946)
Supplement: MOESM2 [file 9559946]

## Mental Component Summary Score (MCS) of the SF-36

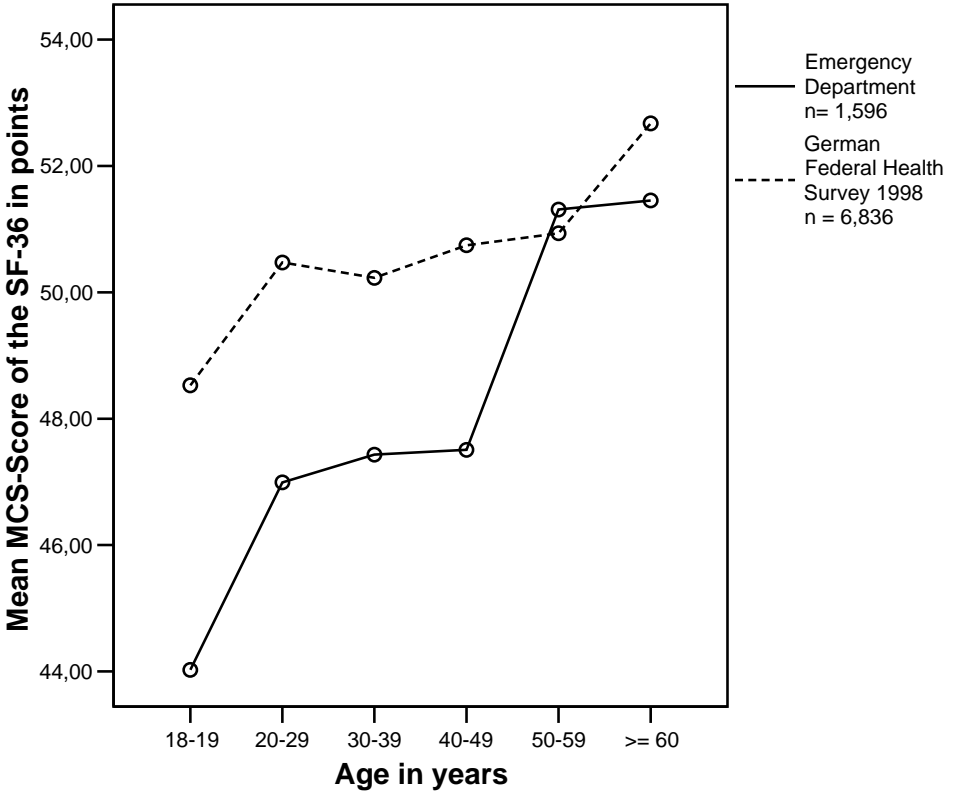

Results of multifactor analysis of variance (ANOVA); Levene-Test:  $p < 0.001$ .

| Parameter                    | F-value | p       |
|------------------------------|---------|---------|
| Gender                       | 41.16   | < 0.001 |
| Age-group                    | 16.38   | < 0.001 |
| Setting                      | 49.67   | < 0.001 |
| Gender * age-group           | 1.11    | 0.354   |
| Gender * setting             | 0.33    | 0.567   |
| Age-group * setting          | 3.98    | 0.001   |
| Gender * age-group * setting | 1.50    | 0.187   |
